# Supplementary material for: Rapid embryonic development supports the early onset of gill functions in two coral reef damselfishes
Source: Oxford University Press journal article supplement (doi:10.1242/jeb.242364), 2021-10-28
Supplement: jeb242364supp.pdf [file jeb242364supp.pdf]

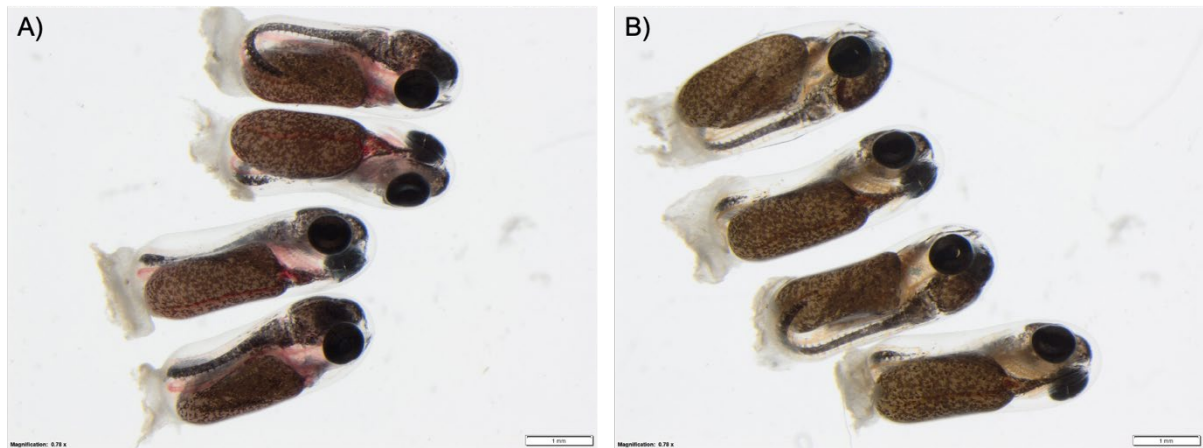

### Phenylhydrazine exposure

**Fig. S1.** Micrographs of *Acanthochromis polyacanthus* embryos at 9 days post fertilization showing: **A)** control embryos with red blood (haemoglobin present) and **B)** phenylhydrazine exposed embryos with yellow-clear blood (haemoglobin destroyed).

**Table S1.** Mass of *Acanthochromis polyacanthus* and *Amphiprion melanopus* embryos across age (dpf).

| Species                            | Age (dpf) | Mass (kg) | Std. error |
|------------------------------------|-----------|-----------|------------|
| <i>Acanthochromis polyacanthus</i> | 1         | 0.004716  | 0.000139   |
|                                    | 2         | 0.004955  | 0.000157   |
|                                    | 3         | 0.005028  | 0.000165   |
|                                    | 4         | 0.004824  | 0.000139   |
|                                    | 5         | 0.004709  | 0.000167   |
|                                    | 6         | 0.004911  | 0.000105   |
|                                    | 7         | 0.004918  | 0.000121   |
|                                    | 8         | 0.004939  | 0.000106   |
|                                    | 9         | 0.005166  | 0.000150   |
| <i>Amphiprion melanopus</i>        | 1         | 0.001800  | 7.06E-05   |
|                                    | 2         | 0.001745  | 8.43E-05   |
|                                    | 3         | 0.001804  | 5.52E-05   |
|                                    | 4         | 0.001626  | 5.79E-05   |
|                                    | 5         | 0.001665  | 5.24E-05   |
|                                    | 6         | 0.001609  | 8.15E-05   |

**Table S2.** Estimated marginal means statistical output for the comparison of  $\dot{M}O_2$  across age in *Acanthochromis polyacanthus* embryos. Results are given on a log scale. Bold text indicates  $\Pr(>|z|)$  values of significance ( $\alpha = 0.05$ ).

| Species                            | Age (dpf)<br>comparison | Estimate | Std. error | D.F.   | t ratio | $\Pr(> z )$   |
|------------------------------------|-------------------------|----------|------------|--------|---------|---------------|
| <i>Acanthochromis polyacanthus</i> | 1-2                     | -0.43949 | 0.161142   | 370    | -2.727  | 0.1419        |
|                                    | 1-3                     | -0.57865 | 0.163173   | 370    | -3.546  | <b>0.0130</b> |
|                                    | 1-4                     | -0.1284  | 0.158182   | 370    | -0.812  | 0.9965        |
|                                    | 1-5                     | -0.45743 | 0.172631   | 370    | -2.650  | 0.1700        |
|                                    | 1-6                     | -0.33924 | 0.15436    | 370    | -2.198  | 0.4093        |
|                                    | 1-7                     | -0.04521 | 0.164823   | 370    | -0.274  | 1.0000        |
|                                    | 1-8                     | -0.3306  | 0.159379   | 370    | -2.074  | 0.4926        |
|                                    | 1-9                     | -0.20363 | 0.169269   | 370    | -1.203  | 0.9556        |
|                                    | 2-3                     | -0.13916 | 0.150334   | 370    | -0.926  | 0.9914        |
|                                    | 2-4                     | 0.311086 | 0.143666   | 370    | 2.165   | 0.4307        |
|                                    | 2-5                     | -0.01794 | 0.158384   | 370    | -0.113  | 1.0000        |
|                                    | 2-6                     | 0.100247 | 0.140815   | 370    | 0.712   | 0.9986        |
|                                    | 2-7                     | 0.394274 | 0.15097    | 370    | 2.612   | 0.1853        |
|                                    | 2-8                     | 0.108888 | 0.144748   | 370    | 0.752   | 0.9979        |
|                                    | 2-9                     | 0.235856 | 0.156478   | 370    | 1.207   | 0.8518        |
|                                    | 3-4                     | 0.450251 | 0.1461     | 370    | 3.082   | 0.0559        |
|                                    | 3-5                     | 0.121224 | 0.16048    | 370    | 0.755   | 0.9979        |
|                                    | 3-6                     | 0.239411 | 0.1414     | 370    | 1.693   | 0.7505        |
|                                    | 3-7                     | 0.533438 | 0.153039   | 370    | 3.486   | <b>0.0159</b> |
|                                    | 3-8                     | 0.248052 | 0.147484   | 370    | 1.682   | 0.7574        |
|                                    | 3-9                     | 0.37502  | 0.158811   | 370    | 2.361   | 0.3086        |
|                                    | 4-5                     | -0.32903 | 0.151022   | 370    | -2.179  | 0.4218        |
|                                    | 4-6                     | -0.21084 | 0.136156   | 370    | -1.549  | 0.8316        |
|                                    | 4-7                     | 0.083187 | 0.144019   | 370    | 0.578   | 0.9997        |
|                                    | 4-8                     | -0.2022  | 0.137315   | 370    | -1.473  | 0.8677        |
|                                    | 4-9                     | -0.07523 | 0.151102   | 370    | -0.498  | 0.9999        |
|                                    | 5-6                     | 0.118187 | 0.151399   | 370    | 0.721   | 0.9973        |
|                                    | 5-7                     | 0.412214 | 0.156746   | 370    | 0.630   | 0.1779        |
|                                    | 5-8                     | 0.126828 | 0.150639   | 370    | 0.842   | 0.9955        |
|                                    | 5-9                     | 0.253797 | 0.164391   | 370    | 1.544   | 0.8339        |
|                                    | 6-7                     | 0.294027 | 0.142155   | 370    | 2.068   | 0.4967        |
|                                    | 6-8                     | 0.008641 | 0.137538   | 370    | 0.063   | 1.0000        |
| 6-9                                | 0.135609                | 0.149432 | 370        | 0.908  | 0.9925  |               |
| 7-8                                | -0.28539                | 0.140303 | 370        | -2.034 | 0.5205  |               |
| 7-9                                | -0.15842                | 0.154927 | 370        | -1.023 | 0.9836  |               |
| 8-9                                | 0.126968                | 0.149683 | 370        | 0.848  | 0.9952  |               |

**Table S3.** Linear mixed effects model statistical output for ionocyte density and size in *Acanthochromis polyacanthus* and *Amphiprion melanopus* embryos. Bold text indicates significant  $p$ -values ( $\alpha = 0.05$ ).

| Metric                      | Species                            | Factor                             | D.F.      | $F$ -value | $p$ -value      |
|-----------------------------|------------------------------------|------------------------------------|-----------|------------|-----------------|
| Ionocyte density            | <i>Acanthochromis polyacanthus</i> | Intercept                          | 1, 89     | 37.16515   | < <b>0.0001</b> |
|                             |                                    | Age                                | 7, 89     | 8.34830    | < <b>0.0001</b> |
|                             |                                    | Tissue                             | 1, 89     | 45.17837   | < <b>0.0001</b> |
|                             |                                    | Age:Tissue                         | 7, 89     | 3.57659    | <b>0.002</b>    |
|                             | <i>Amphiprion melanopus</i>        | Intercept                          | 1, 57     | 720.8790   | < <b>0.0001</b> |
|                             |                                    | Age                                | 5, 57     | 2.1497     | <b>0.0725</b>   |
|                             |                                    | Tissue                             | 1, 57     | 49.5779    | < <b>0.0001</b> |
|                             | Ionocyte size                      | <i>Acanthochromis polyacanthus</i> | Intercept | 1, 1121    | 3204.969        |
| Age                         |                                    |                                    | 7, 1121   | 45.986     | < <b>0.0001</b> |
| Tissue                      |                                    |                                    | 1, 1121   | 713.476    | < <b>0.0001</b> |
| Age:Tissue                  |                                    |                                    | 7, 1121   | 19.042     | < <b>0.0001</b> |
| <i>Amphiprion melanopus</i> |                                    | Intercept                          | 1, 810    | 9022.536   | < <b>0.0001</b> |
|                             |                                    | Age                                | 5, 810    | 33.621     | < <b>0.0001</b> |
|                             |                                    | Tissue                             | 1, 810    | 542.841    | < <b>0.0001</b> |
|                             |                                    | Age:Tissue                         | 5, 810    | 2.525      | <b>0.028</b>    |

**Table S4.** Estimated marginal means statistical output for the comparison of ionocyte density across tissue and age in *Acanthochromis polyacanthus* embryos. Bold text indicates  $\Pr(>|z|)$  values of significance ( $\alpha = 0.05$ ).

[Click here to download Table S4](#)

**Table S5.** Estimated marginal means statistical output for the comparison of ionocyte size across tissue and age in *Acanthochromis polyacanthus* and *Amphiprion melanopus* embryos. Results are given on a log scale. Bold text indicates  $\Pr(>|z|)$  values of significance ( $\alpha = 0.05$ ).

[Click here to download Table S5](#)
